# Supplementary material for: Rapid On-Site Detection of Illicit Drugs in Smuggled Samples with a Portable Electrochemical Device
Source: MDPI journal article supplement (doi:10.3390/chemosensors10030108), 2022-03-11

# Rapid On-Site Detection of Illicit Drugs in Smuggled Samples with a Portable Electrochemical Device <sup>†</sup>

Marc Parrilla <sup>1,2</sup>, Amorn Slosse <sup>3</sup>, Robin Van Echelpoel <sup>1,2</sup>, Noelia Felipe Montiel <sup>1,2</sup>, Amelia R. Langley <sup>1,2</sup>, Filip Van Durme <sup>3</sup> and Karolien De Wael <sup>1,2,\*</sup>

<sup>1</sup> A-Sense Lab, Department of Bioscience Engineering, University of Antwerp, Groenenborgerlaan 171, 2020 Antwerp, Belgium; marc.parrillapons@uantwerpen.be (M.P.); robin.vanechelpoel@uantwerpen.be (R.V.E.); oelia.felipemontiel@uantwerpen.be (N.F.M.); amelia.langley@uantwerpen.be (A.R.L.)

<sup>2</sup> NANOlaboratory Center of Excellence, University of Antwerp, Groenenborgerlaan 171, 2020 Antwerp, Belgium

<sup>3</sup> Drugs and Toxicology Department, National Institute for Criminalistics and Criminology (NICC), Vilvoordsesteenweg 100, 1120 Brussels, Belgium; amorn.slosse@just.fgov.be (A.S.); filip.vandurme@just.fgov.be (F.V.D.)

\* Correspondence: karolien.dewael@uantwerpen.be; Tel.: +32-32653335

<sup>†</sup> This paper is an extended version of the paper Portable Electrochemical Detection of Illicit Drugs in Smuggled Samples: Towards More Secure Borders. In Proceedings of the 1st International Electronic Conference on Chemical Sensors and Analytical Chemistry, 1–15 July 2021.

## Table of contents

|                                                                     |             |
|---------------------------------------------------------------------|-------------|
| <b>Figures</b> .....                                                | <b>SM-2</b> |
| <i>Figure S1.</i> Example of the interface displayed .....          | SM-2        |
| <i>Figure S2.</i> Electrochemical profiles from SWV (raw data)..... | SM-3        |
| <i>Figure S3.</i> Screen-shots of the interface output .....        | SM-5        |

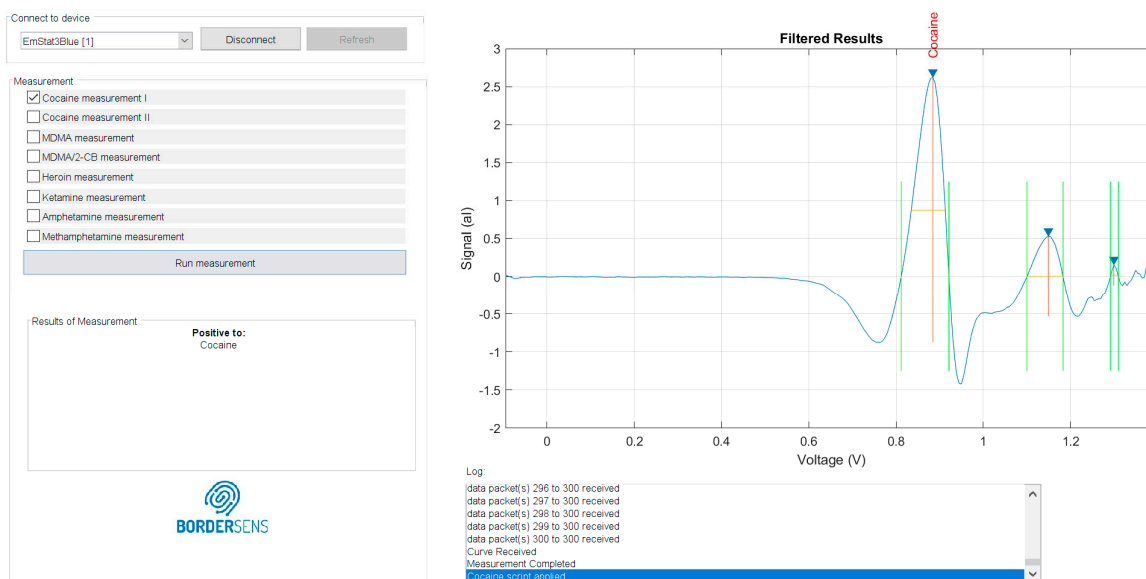

**Figure S1.** Example of the interface displayed in a laptop showing a positive result for cocaine along with its electrochemical profile.

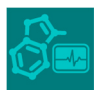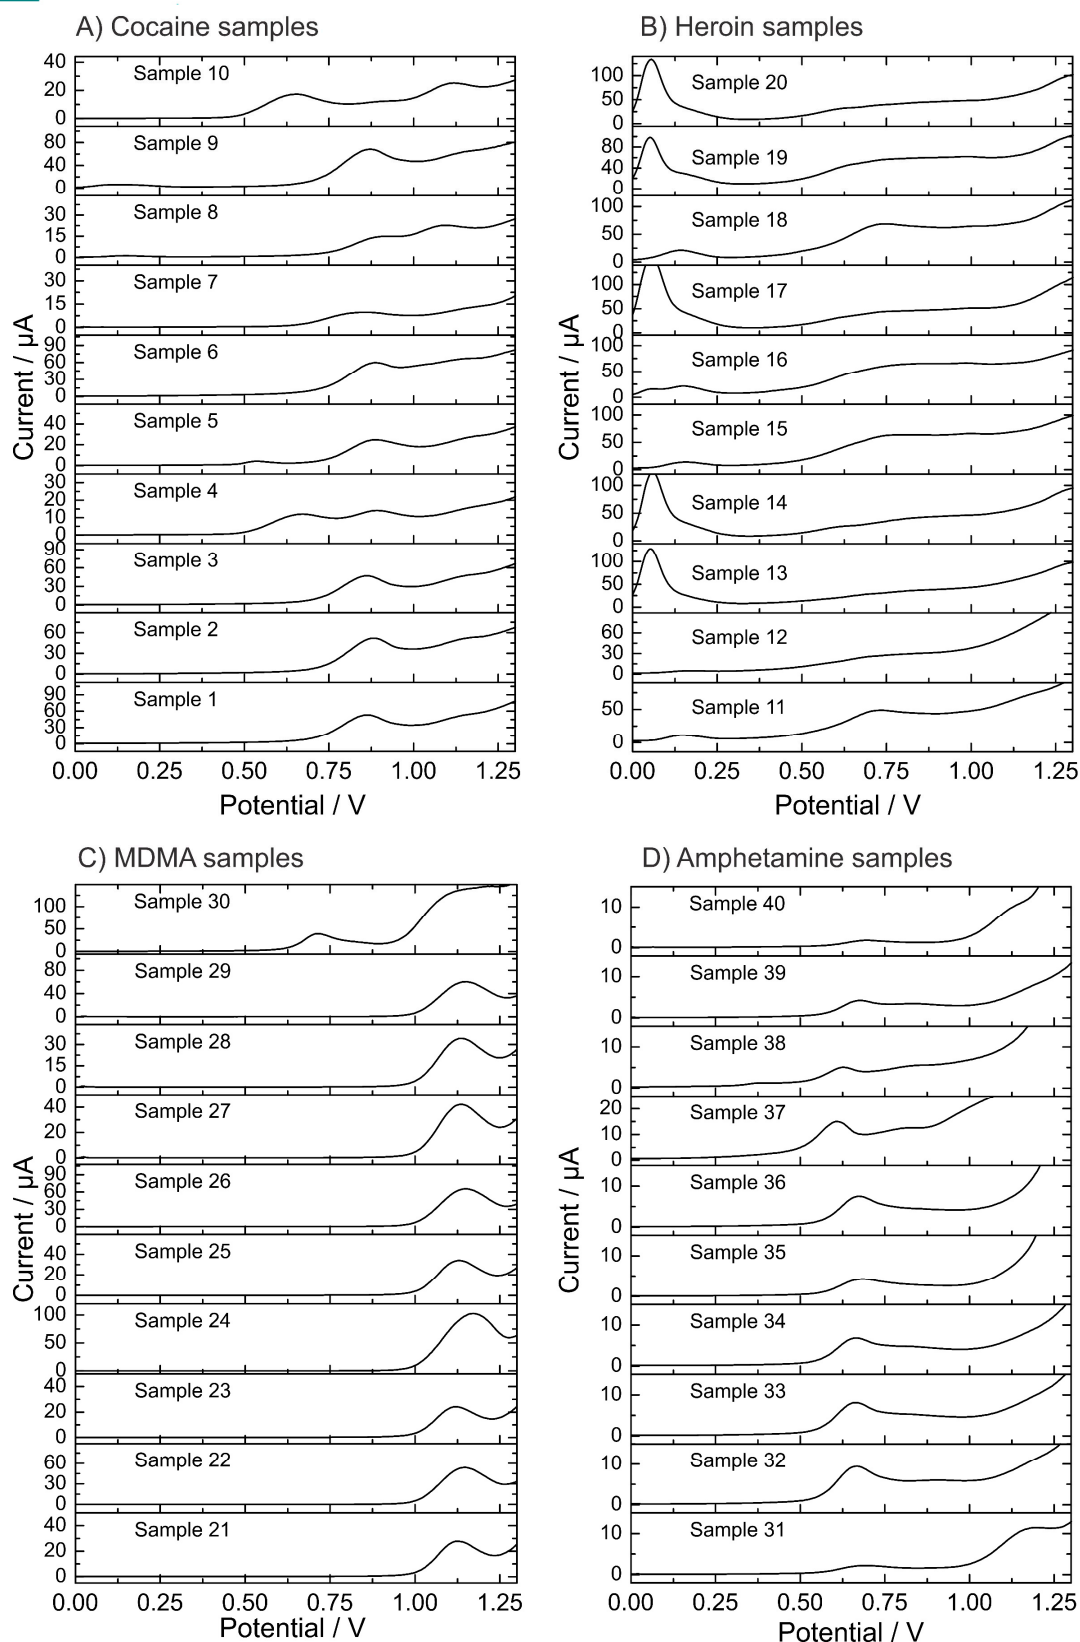

**Figure S2.** Square-wave voltammograms from the electrochemical analysis of the confiscated samples: A) cocaine samples, B) heroin samples, C) MDMA samples, and D) amphetamine samples.

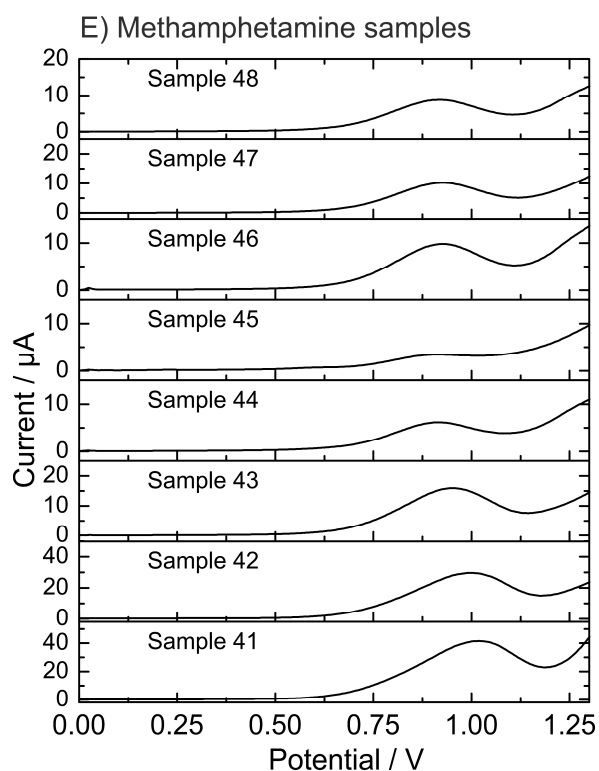

**Figure S2 cont.** Square-wave voltammograms from the electrochemical analysis of the confiscated samples: E) Methamphetamine samples.



**Figure S3.** Compilation of the screenshots from the analytical outputs obtained after the electrochemical analysis.

### Sample 1

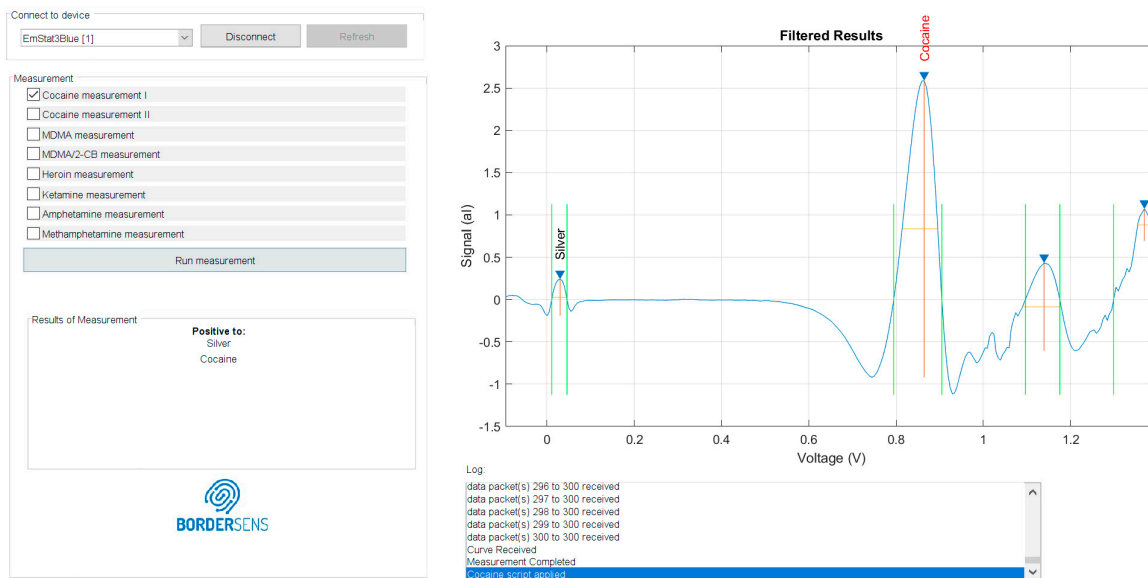

### Sample 2

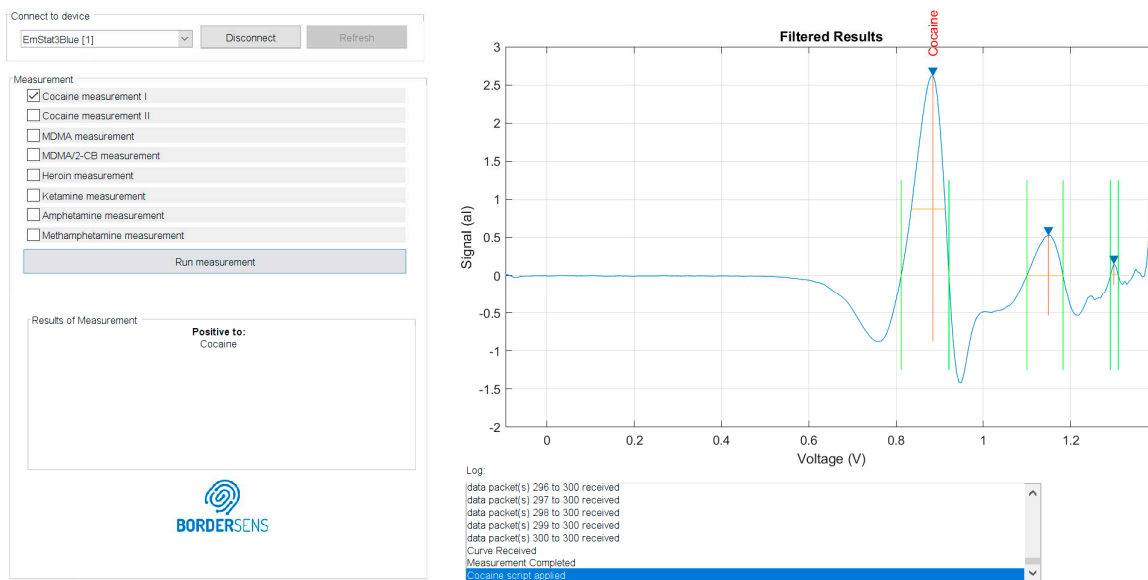

## Sample 3

Connect to device  
EmStat3Blue [1] Disconnect Refresh

Measurement

☒ Cocaine measurement I  
☐ Cocaine measurement II  
☐ MDMA measurement  
☐ MDMA/2-CB measurement  
☐ Heroin measurement  
☐ Ketamine measurement  
☐ Amphetamine measurement  
☐ Methamphetamine measurement

Run measurement

Results of Measurement

Positive to:  
Cocaine



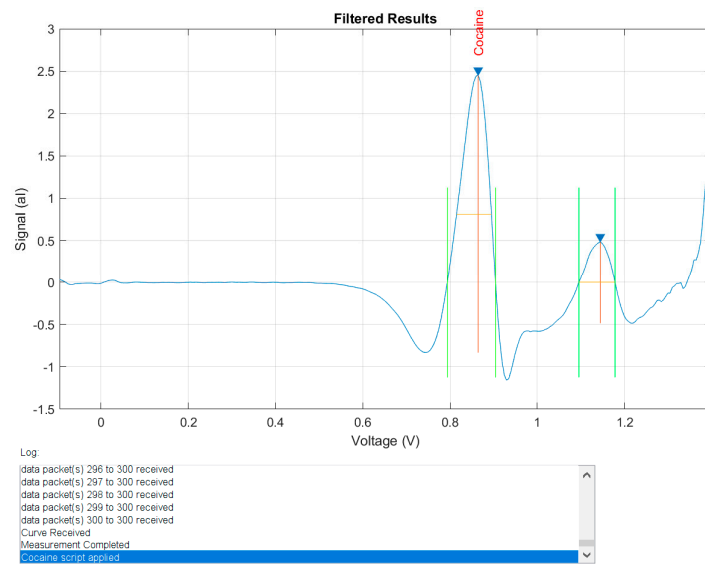

## Sample 4

Connect to device  
EmStat3Blue [1] Disconnect Refresh

Measurement

☒ Cocaine measurement I  
☐ Cocaine measurement II  
☐ MDMA measurement  
☐ MDMA/2-CB measurement  
☐ Heroin measurement  
☐ Ketamine measurement  
☐ Amphetamine measurement  
☐ Methamphetamine measurement

Run measurement

Results of Measurement

Positive to:  
Cocaine



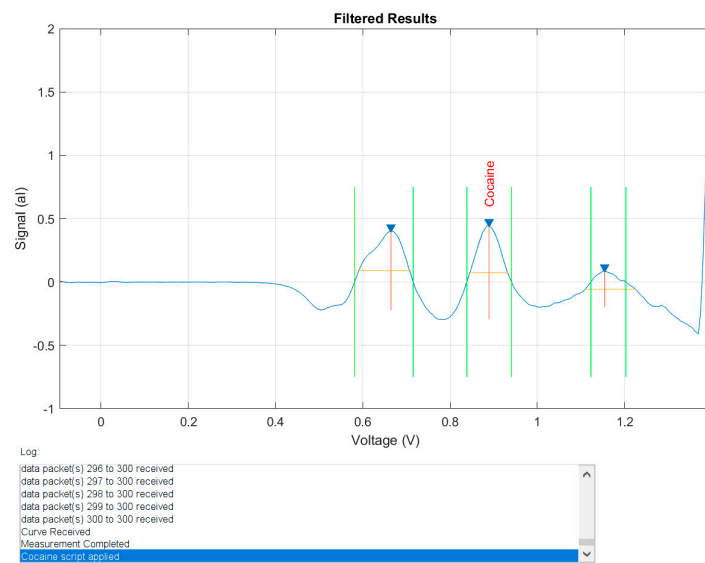

## Sample 5

Connect to device  
EmStat3Blue [1] Disconnect Refresh

Measurement

☒ Cocaine measurement I  
☐ Cocaine measurement II  
☐ MDMA measurement  
☐ MDMA/2-CB measurement  
☐ Heroin measurement  
☐ Ketamine measurement  
☐ Amphetamine measurement  
☐ Methamphetamine measurement

Run measurement

Results of Measurement

**Positive to:**  
Cocaine



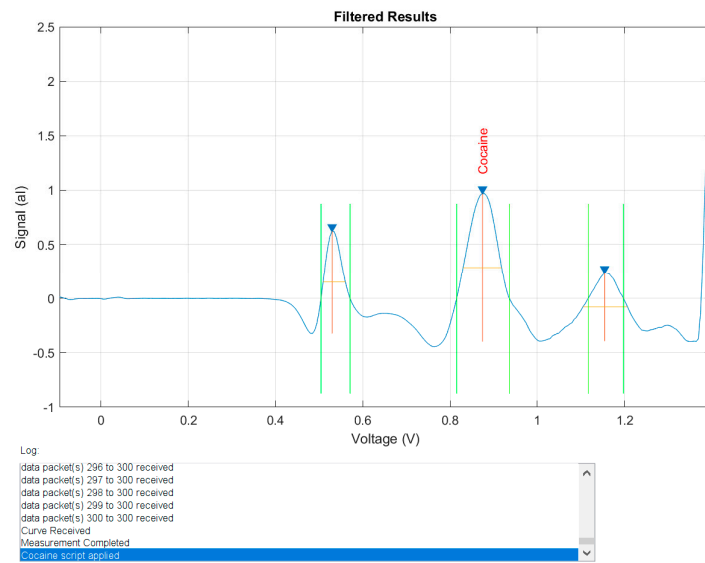

## Sample 6

Connect to device  
EmStat3Blue [1] Disconnect Refresh

Measurement

☒ Cocaine measurement I  
☐ Cocaine measurement II  
☐ MDMA measurement  
☐ MDMA/2-CB measurement  
☐ Heroin measurement  
☐ Ketamine measurement  
☐ Amphetamine measurement  
☐ Methamphetamine measurement

Run measurement

Results of Measurement

**Positive to:**  
Cocaine



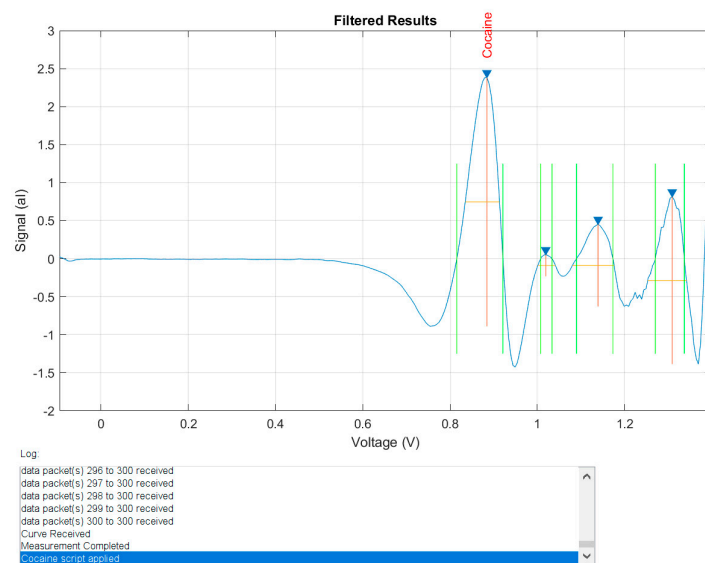

## Sample 7

Connect to device  
EmStat3Blue [1] Disconnect Refresh

Measurement

☒ Cocaine measurement I  
☐ Cocaine measurement II  
☐ MDMA measurement  
☐ MDMA/2-CB measurement  
☐ Heroin measurement  
☐ Ketamine measurement  
☐ Amphetamine measurement  
☐ Methamphetamine measurement

Run measurement

Results of Measurement

**Positive to:**  
Cocaine



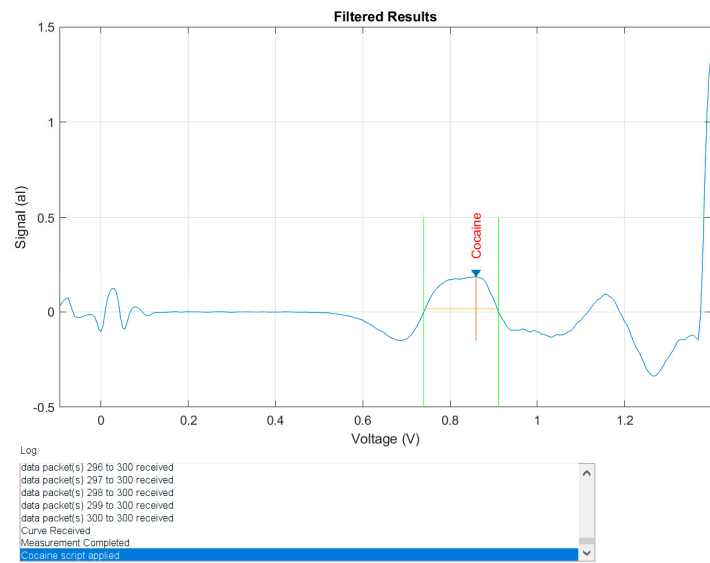

## Sample 8

Connect to device  
EmStat3Blue [1] Disconnect Refresh

Measurement

☒ Cocaine measurement I  
☐ Cocaine measurement II  
☐ MDMA measurement  
☐ MDMA/2-CB measurement  
☐ Heroin measurement  
☐ Ketamine measurement  
☐ Amphetamine measurement  
☐ Methamphetamine measurement

Run measurement

Results of Measurement

**Positive to:**  
Cocaine



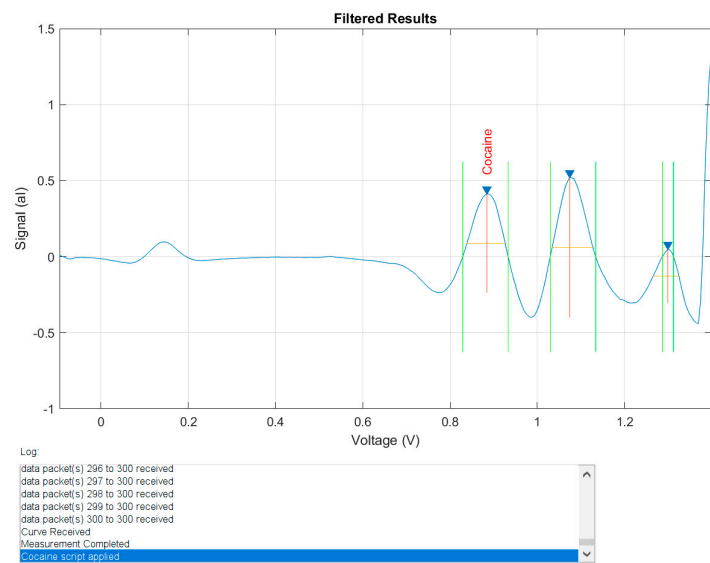

## Sample 9

Connect to device  
 EmStat3Blue [1] Disconnect Refresh

Measurement

☒ Cocaine measurement I  
☐ Cocaine measurement II  
☐ MDMA measurement  
☐ MDMA/2-CB measurement  
☐ Heroin measurement  
☐ Ketamine measurement  
☐ Amphetamine measurement  
☐ Methamphetamine measurement

Run measurement

Results of Measurement

**Positive to:**  
 Cocaine



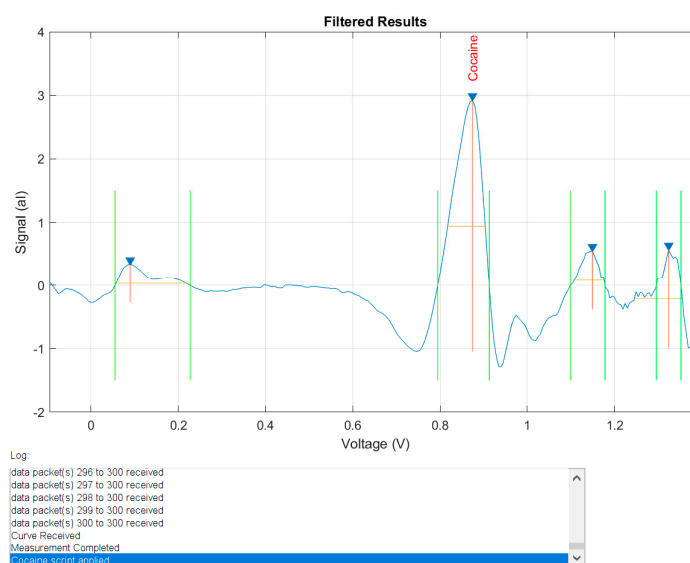

## Sample 10

Connect to device  
 EmStat3Blue [1] Disconnect Refresh

Measurement

☒ Cocaine measurement I  
☐ Cocaine measurement II  
☐ MDMA measurement  
☐ MDMA/2-CB measurement  
☐ Heroin measurement  
☐ Ketamine measurement  
☐ Amphetamine measurement  
☐ Methamphetamine measurement

Run measurement

Results of Measurement

**Positive to:**  
 Cocaine



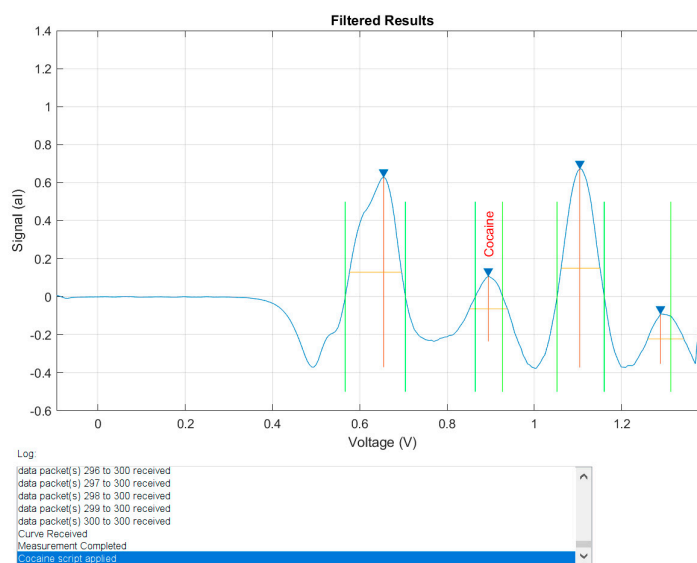

## Sample 11

Connect to device  
EmStat3Blue [1] Disconnect Refresh

Measurement

☐ Cocaine measurement I  
☐ Cocaine measurement II  
☐ MDMA measurement  
☐ MDMA/2-CB measurement  
☒ Heroin measurement  
☐ Ketamine measurement  
☐ Amphetamine measurement  
☐ Methamphetamine measurement

Run measurement

Results of Measurement

**Positive to:**  
Silver  
Heroin1  
Heroin2



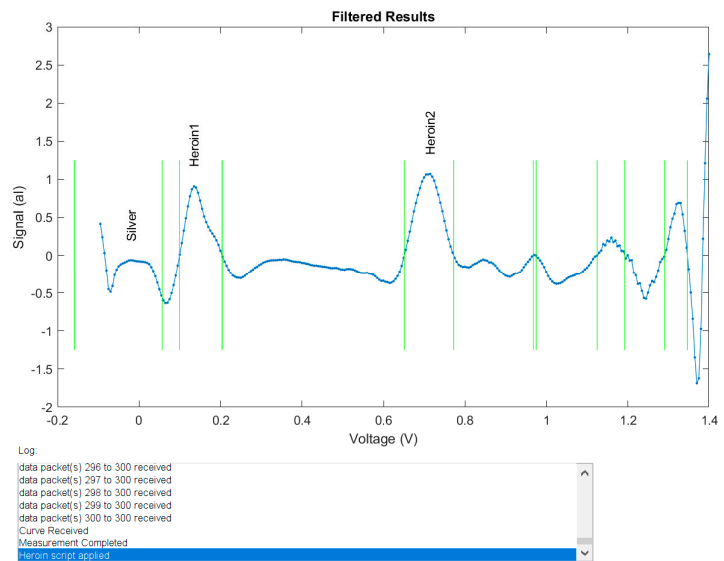

## Sample 12

Connect to device  
EmStat3Blue [1] Disconnect Refresh

Measurement

☐ Cocaine measurement I  
☐ Cocaine measurement II  
☐ MDMA measurement  
☐ MDMA/2-CB measurement  
☒ Heroin measurement  
☐ Ketamine measurement  
☐ Amphetamine measurement  
☐ Methamphetamine measurement

Run measurement

Results of Measurement

**Positive to:**  
Silver  
Heroin1  
Heroin2



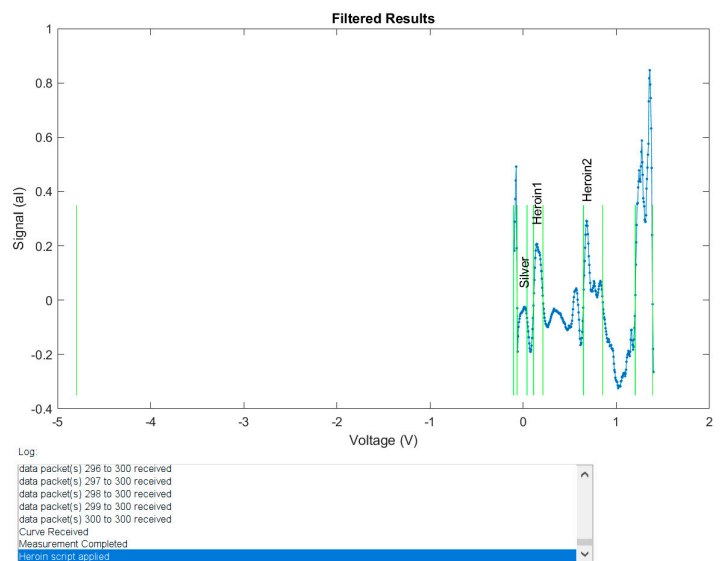

## Sample 13

Connect to device  
EmStat3Blue [1] Disconnect Refresh

Measurement

- ☐ Cocaine measurement I
- ☐ Cocaine measurement II
- ☐ MDMA measurement
- ☐ MDMA/2-CB measurement
- ☒ Heroin measurement
- ☐ Ketamine measurement
- ☐ Amphetamine measurement
- ☐ Methamphetamine measurement

Run measurement

Results of Measurement

**Positive to:**  
Paracetamol  
Heroin1  
Heroin2


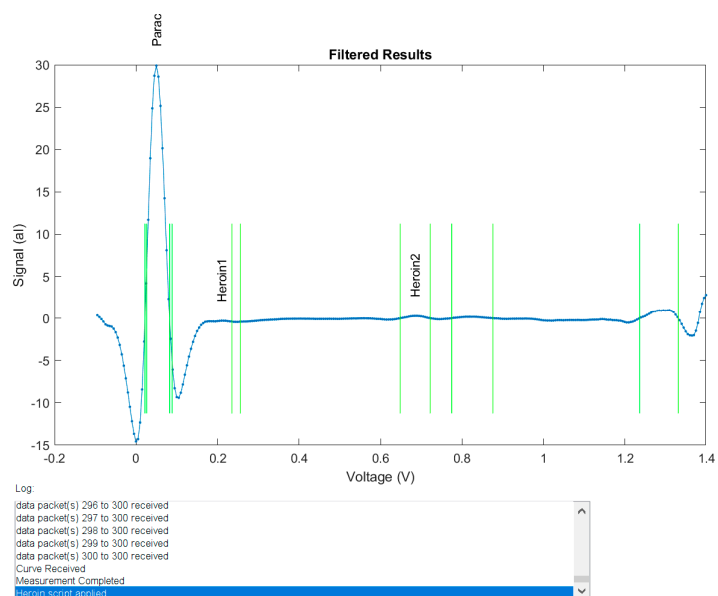

## Sample 14

Connect to device  
EmStat3Blue [1] Disconnect Refresh

Measurement

- ☐ Cocaine measurement I
- ☐ Cocaine measurement II
- ☐ MDMA measurement
- ☐ MDMA/2-CB measurement
- ☒ Heroin measurement
- ☐ Ketamine measurement
- ☐ Amphetamine measurement
- ☐ Methamphetamine measurement

Run measurement

Results of Measurement

**Positive to:**  
Paracetamol  
Heroin1  
Heroin2


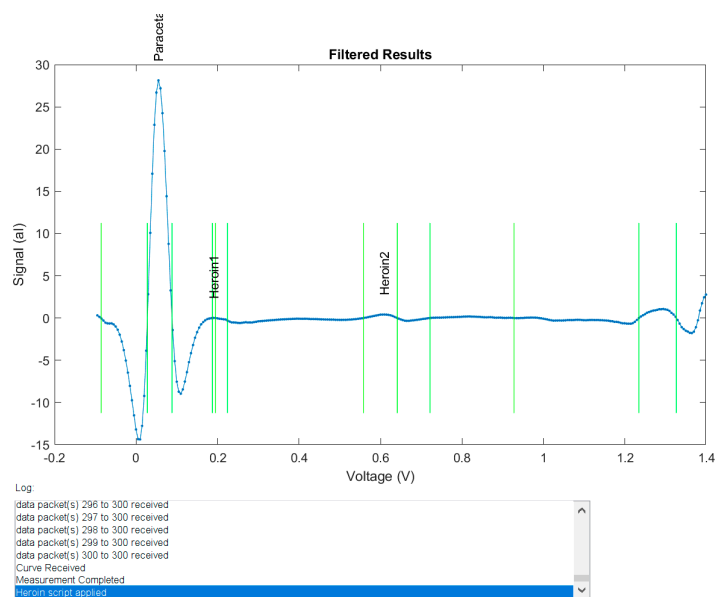

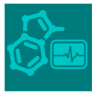

## Sample 15

Connect to device  
EmStat3Blue [1] Disconnect Refresh

Measurement

- ☐ Cocaine measurement I
- ☐ Cocaine measurement II
- ☐ MDMA measurement
- ☐ MDMA/2-CB measurement
- ☒ Heroin measurement
- ☐ Ketamine measurement
- ☐ Amphetamine measurement
- ☐ Methamphetamine measurement

Run measurement

Results of Measurement

**Positive to:**  
Silver  
Heroin1  
Heroin2

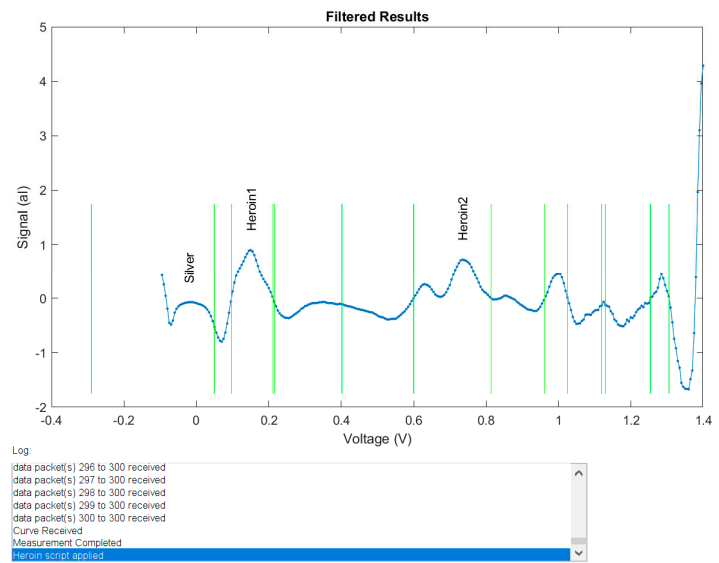

## Sample 16

Connect to device  
EmStat3Blue [1] Disconnect Refresh

Measurement

- ☐ Cocaine measurement I
- ☐ Cocaine measurement II
- ☐ MDMA measurement
- ☐ MDMA/2-CB measurement
- ☒ Heroin measurement
- ☐ Ketamine measurement
- ☐ Amphetamine measurement
- ☐ Methamphetamine measurement

Run measurement

Results of Measurement

**Positive to:**  
Paracetamol  
Heroin1  
Heroin2

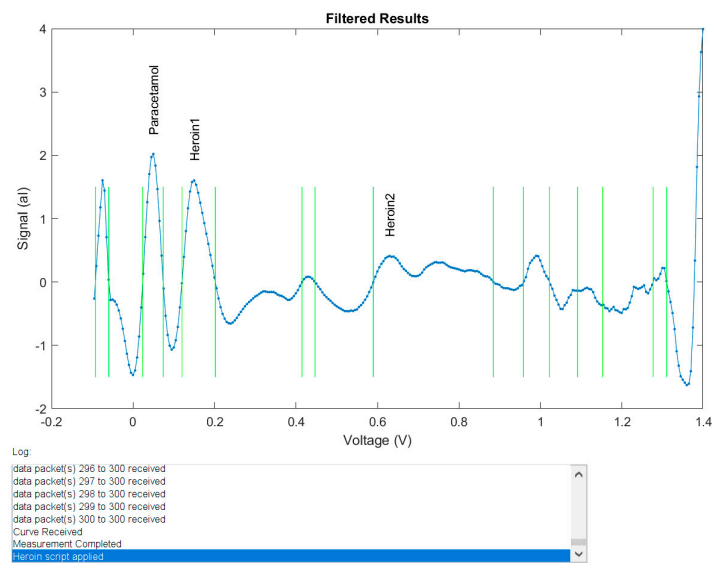



## Sample 17

Connect to device  
EmStat3Blue [1] Disconnect Refresh

Measurement

- ☐ Cocaine measurement I
- ☐ Cocaine measurement II
- ☐ MDMA measurement
- ☐ MDMA/2-CB measurement
- ☒ Heroin measurement
- ☐ Ketamine measurement
- ☐ Amphetamine measurement
- ☐ Methamphetamine measurement

Run measurement

Results of Measurement

**Positive to:**  
Paracetamol  
Heroin1  
Heroin2



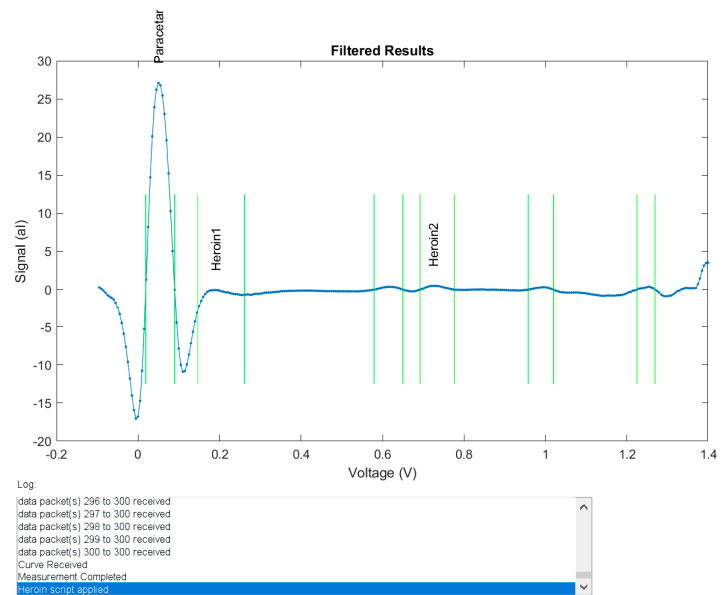

## Sample 18

Connect to device  
EmStat3Blue [1] Disconnect Refresh

Measurement

- ☐ Cocaine measurement I
- ☐ Cocaine measurement II
- ☐ MDMA measurement
- ☐ MDMA/2-CB measurement
- ☒ Heroin measurement
- ☐ Ketamine measurement
- ☐ Amphetamine measurement
- ☐ Methamphetamine measurement

Run measurement

Results of Measurement

**Positive to:**  
Silver  
Heroin1  
Heroin2



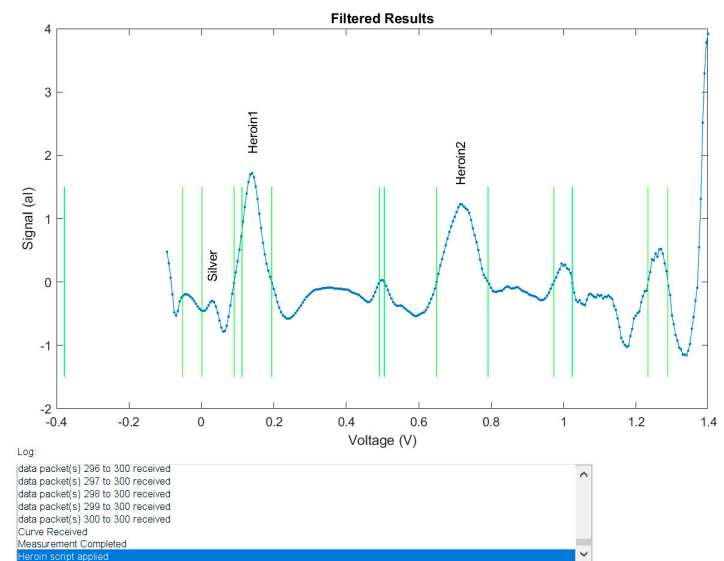



## Sample 19

Connect to device  
EmStat3Blue [1] Disconnect Refresh

Measurement

- ☐ Cocaine measurement I
- ☐ Cocaine measurement II
- ☐ MDMA measurement
- ☐ MDMA/2-CB measurement
- ☒ Heroin measurement
- ☐ Ketamine measurement
- ☐ Amphetamine measurement
- ☐ Methamphetamine measurement

Run measurement

Results of Measurement

**Positive to:**  
Paracetamol  
Heroin1  
Heroin2

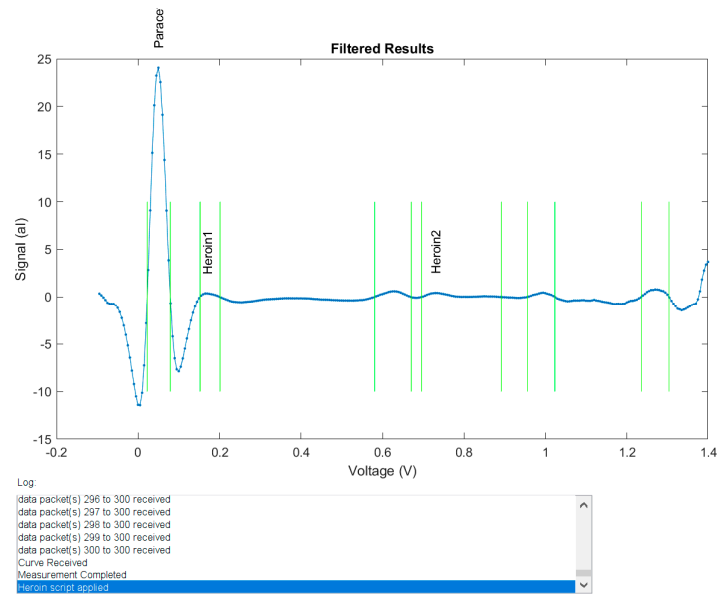

## Sample 20

Connect to device  
EmStat3Blue [1] Disconnect Refresh

Measurement

- ☐ Cocaine measurement I
- ☐ Cocaine measurement II
- ☐ MDMA measurement
- ☐ MDMA/2-CB measurement
- ☒ Heroin measurement
- ☐ Ketamine measurement
- ☐ Amphetamine measurement
- ☐ Methamphetamine measurement

Run measurement

Results of Measurement

**Positive to:**  
Paracetamol  
Heroin1  
Heroin2

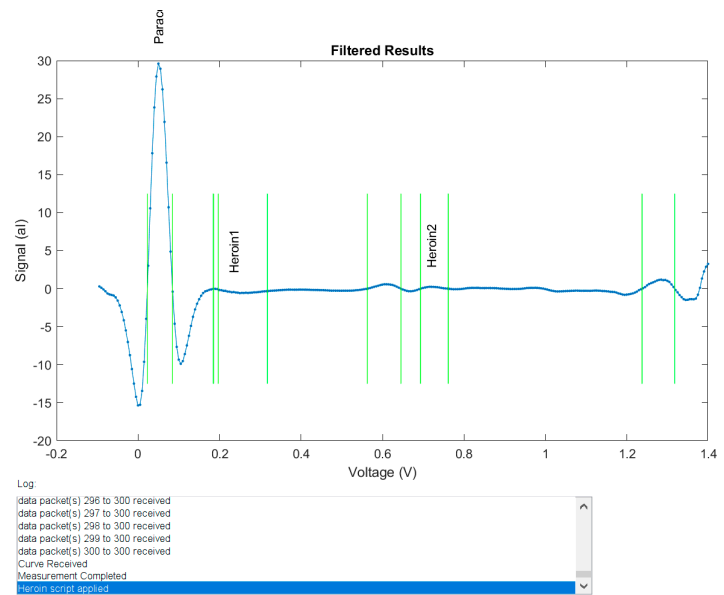



## Sample 21

Connect to device  
EmStat3Blue [1] Disconnect Refresh

Measurement

- ☐ Cocaine measurement I
- ☐ Cocaine measurement II
- ☒ MDMA measurement
- ☐ MDMA/2-CB measurement
- ☐ Heroin measurement
- ☐ Ketamine measurement
- ☐ Amphetamine measurement
- ☐ Methamphetamine measurement

Run measurement

Results of Measurement

**Positive to:**  
MDMA

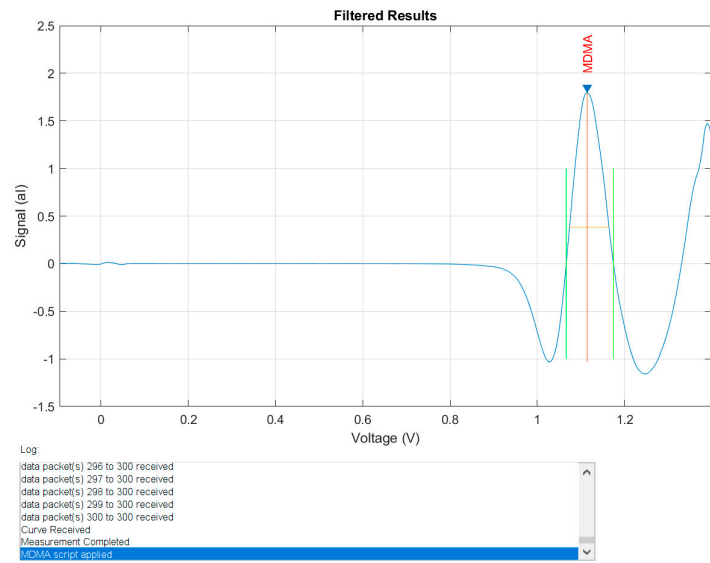

## Sample 22

Connect to device  
EmStat3Blue [1] Disconnect Refresh

Measurement

- ☐ Cocaine measurement I
- ☐ Cocaine measurement II
- ☒ MDMA measurement
- ☐ MDMA/2-CB measurement
- ☐ Heroin measurement
- ☐ Ketamine measurement
- ☐ Amphetamine measurement
- ☐ Methamphetamine measurement

Run measurement

Results of Measurement

**Positive to:**  
MDMA

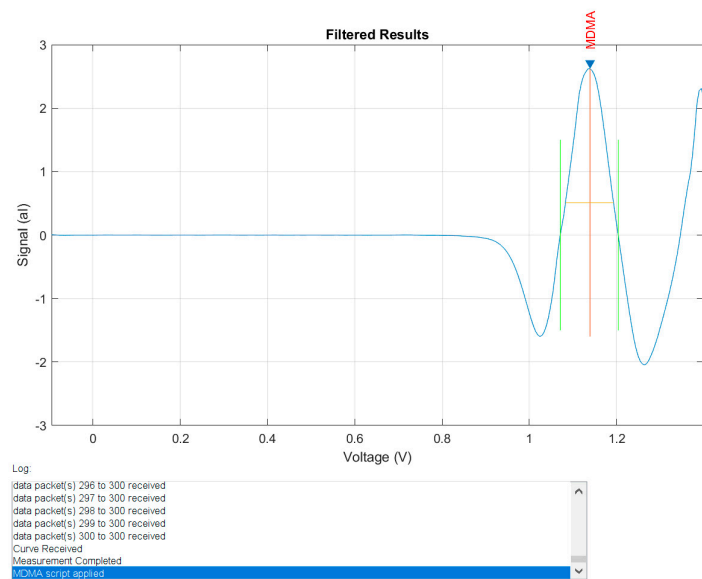



## Sample 23

Connect to device  
EmStat3Blue [1] Disconnect Refresh

Measurement

- ☐ Cocaine measurement I
- ☐ Cocaine measurement II
- ☒ MDMA measurement
- ☐ MDMA/2-CB measurement
- ☐ Heroin measurement
- ☐ Ketamine measurement
- ☐ Amphetamine measurement
- ☐ Methamphetamine measurement

Run measurement

Results of Measurement

Positive to:  
MDMA

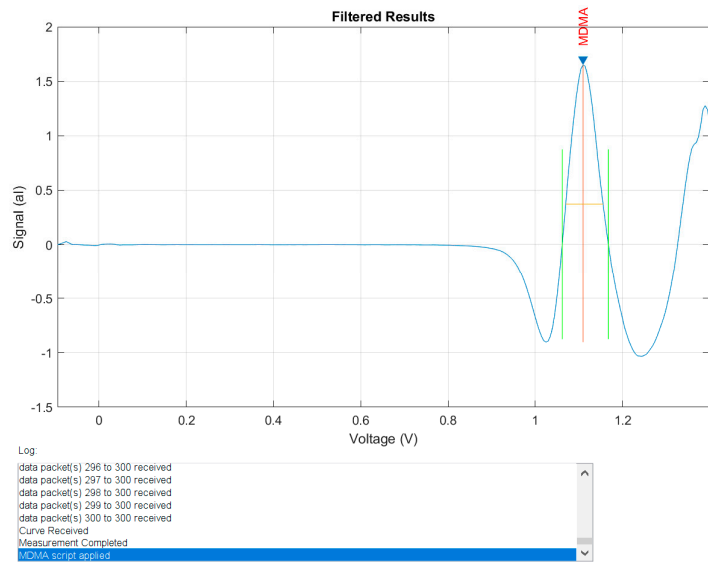

## Sample 24

Connect to device  
EmStat3Blue [1] Disconnect Refresh

Measurement

- ☐ Cocaine measurement I
- ☐ Cocaine measurement II
- ☒ MDMA measurement
- ☐ MDMA/2-CB measurement
- ☐ Heroin measurement
- ☐ Ketamine measurement
- ☐ Amphetamine measurement
- ☐ Methamphetamine measurement

Run measurement

Results of Measurement

Positive to:

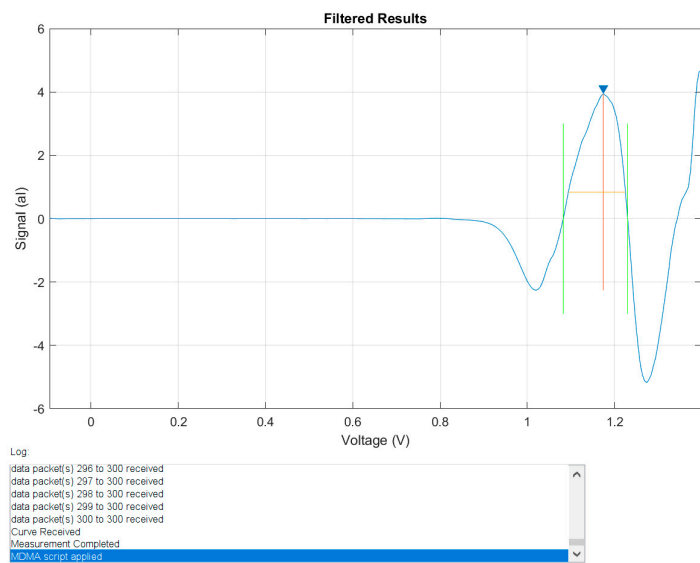

## Sample 25

Connect to device  
EmStat3Blue [1] Disconnect Refresh

Measurement

☐ Cocaine measurement I  
☐ Cocaine measurement II  
☒ MDMA measurement  
☐ MDMA/2-CB measurement  
☐ Heroin measurement  
☐ Ketamine measurement  
☐ Amphetamine measurement  
☐ Methamphetamine measurement

Run measurement

Results of Measurement

**Positive to:**  
MDMA



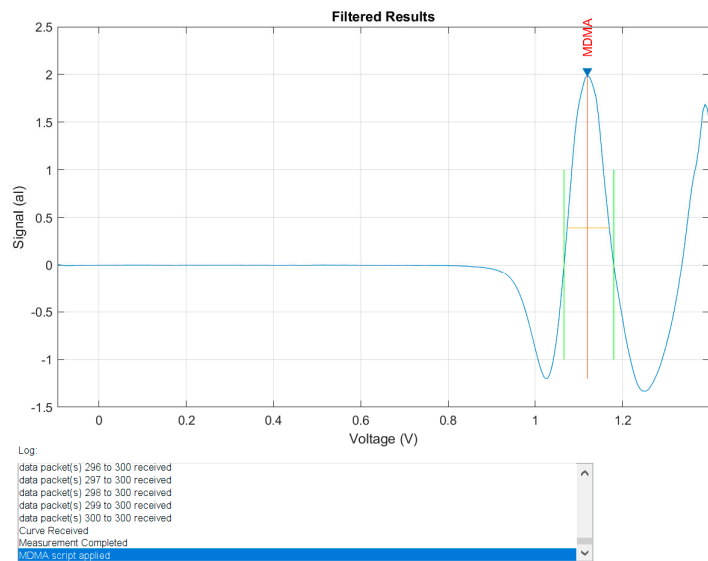

## Sample 26

Connect to device  
EmStat3Blue [1] Disconnect Refresh

Measurement

☐ Cocaine measurement I  
☐ Cocaine measurement II  
☒ MDMA measurement  
☐ MDMA/2-CB measurement  
☐ Heroin measurement  
☐ Ketamine measurement  
☐ Amphetamine measurement  
☐ Methamphetamine measurement

Run measurement

Results of Measurement

**Positive to:**  
MDMA



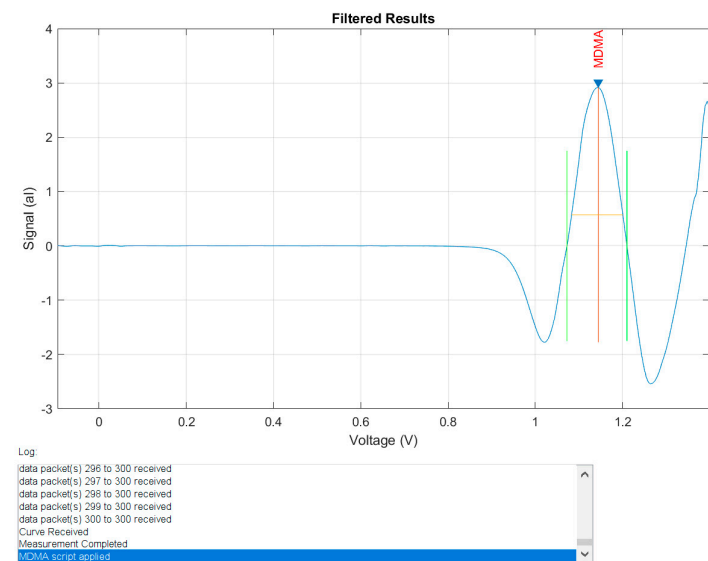

## Sample 27

Connect to device  
EmStat3Blue [1] Disconnect Refresh

Measurement

☐ Cocaine measurement I  
☐ Cocaine measurement II  
☒ MDMA measurement  
☐ MDMA/2-CB measurement  
☐ Heroin measurement  
☐ Ketamine measurement  
☐ Amphetamine measurement  
☐ Methamphetamine measurement

Run measurement

Results of Measurement

**Positive to:**  
Silver  
MDMA



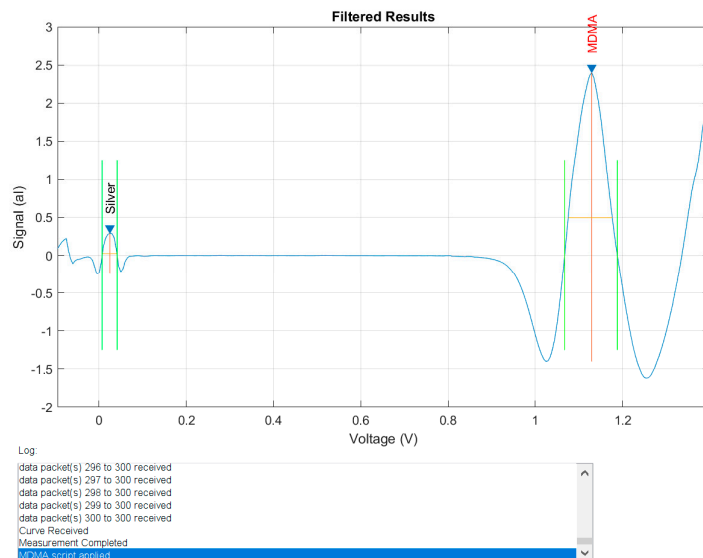

## Sample 28

Connect to device  
EmStat3Blue [1] Disconnect Refresh

Measurement

☐ Cocaine measurement I  
☐ Cocaine measurement II  
☒ MDMA measurement  
☐ MDMA/2-CB measurement  
☐ Heroin measurement  
☐ Ketamine measurement  
☐ Amphetamine measurement  
☐ Methamphetamine measurement

Run measurement

Results of Measurement

**Positive to:**  
Silver  
MDMA



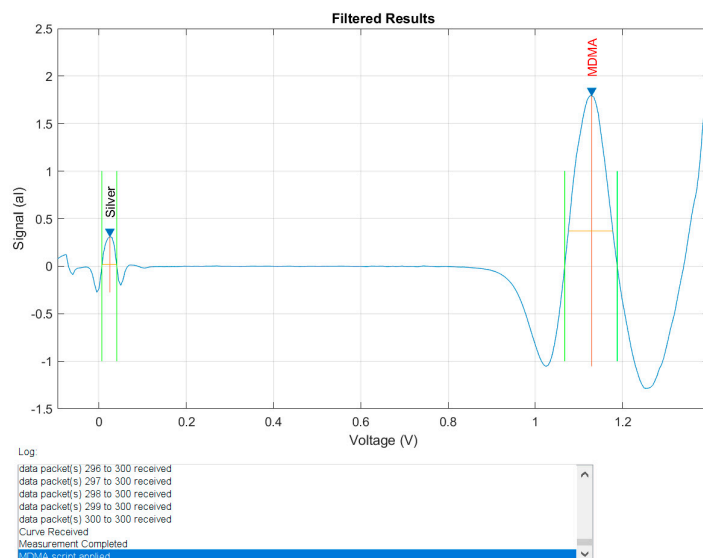



## Sample 29

Connect to device  
EmStat3Blue [1] Disconnect Refresh

Measurement

- ☐ Cocaine measurement I
- ☐ Cocaine measurement II
- ☒ MDMA measurement
- ☐ MDMA/2-CB measurement
- ☐ Heroin measurement
- ☐ Ketamine measurement
- ☐ Amphetamine measurement
- ☐ Methamphetamine measurement

Run measurement

Results of Measurement

**Positive to:**  
Silver  
MDMA

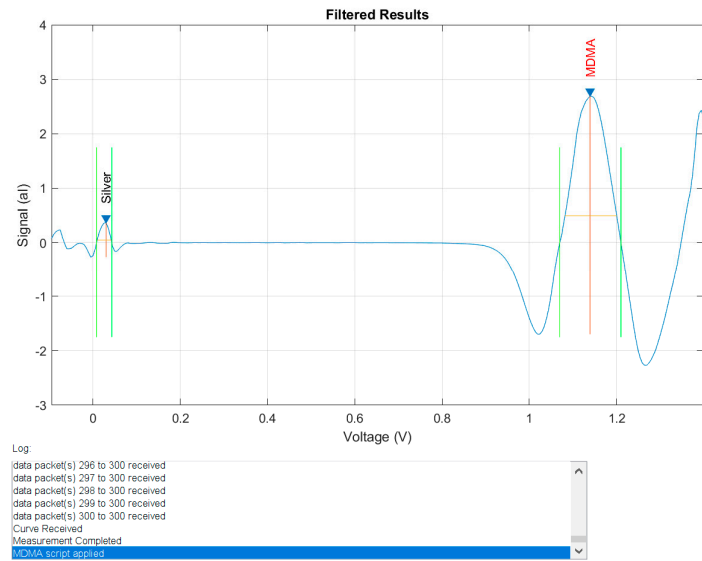

## Sample 30

Connect to device  
EmStat3Blue [1] Disconnect Refresh

Measurement

- ☐ Cocaine measurement I
- ☐ Cocaine measurement II
- ☒ MDMA measurement
- ☐ MDMA/2-CB measurement
- ☐ Heroin measurement
- ☐ Ketamine measurement
- ☐ Amphetamine measurement
- ☐ Methamphetamine measurement

Run measurement

Results of Measurement

**Positive to:**  
MDMA

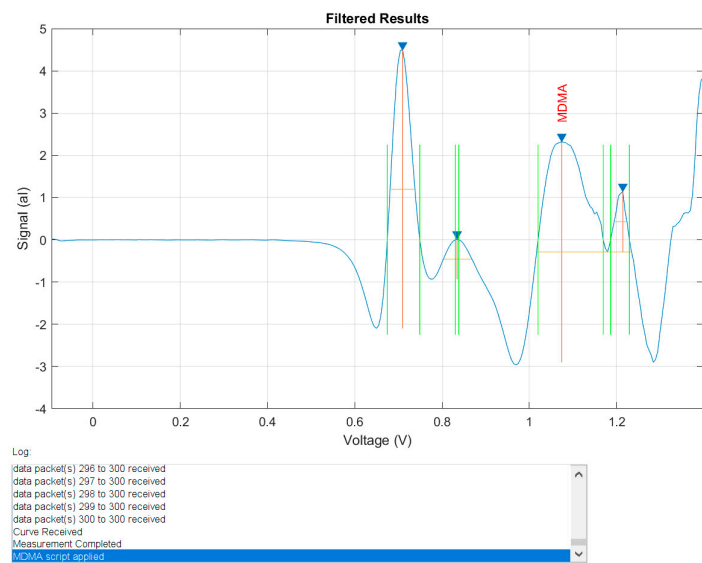



## Sample 31

Connect to device  
EmStat3Blue [1] Disconnect Refresh

Measurement

- ☐ Cocaine measurement I
- ☐ Cocaine measurement II
- ☐ MDMA measurement
- ☐ MDMA/2-CB measurement
- ☐ Heroin measurement
- ☐ Ketamine measurement
- ☒ Amphetamine measurement
- ☐ Methamphetamine measurement

Run measurement

Results of Measurement

Positive to:

Amphetamine

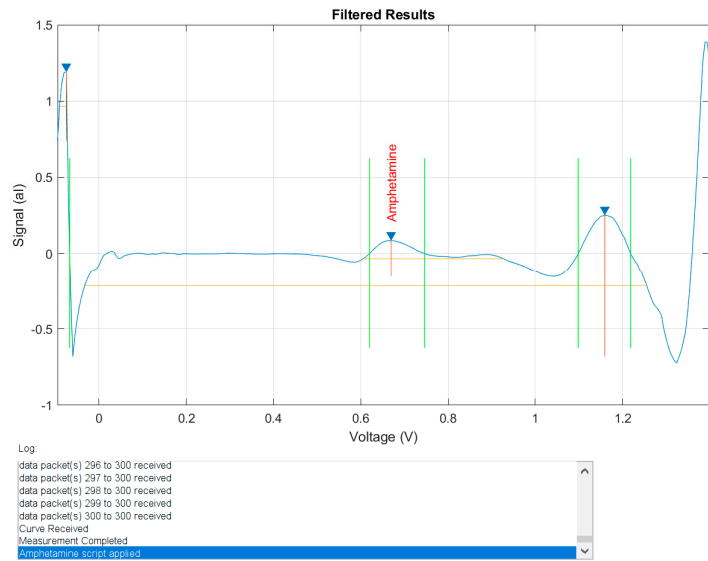

## Sample 32

Connect to device  
EmStat3Blue [1] Disconnect Refresh

Measurement

- ☐ Cocaine measurement I
- ☐ Cocaine measurement II
- ☐ MDMA measurement
- ☐ MDMA/2-CB measurement
- ☐ Heroin measurement
- ☐ Ketamine measurement
- ☒ Amphetamine measurement
- ☐ Methamphetamine measurement

Run measurement

Results of Measurement

Positive to:

Amphetamine

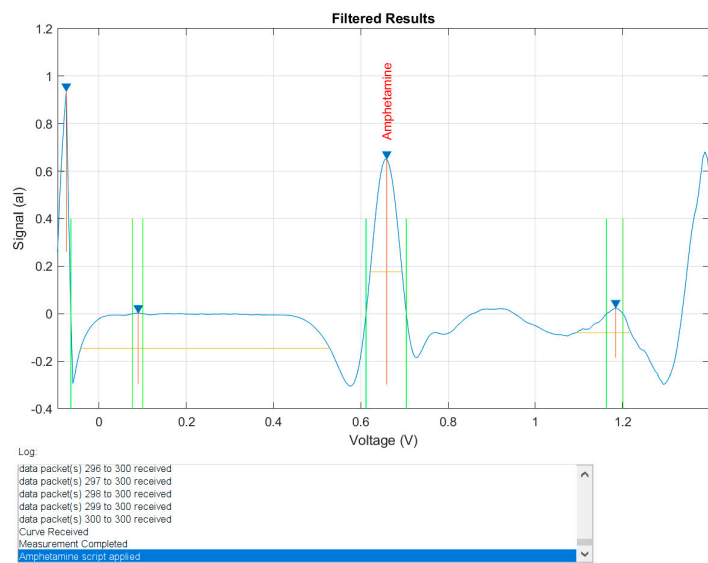



## Sample 33

Connect to device  
EmStat3Blue [1] Disconnect Refresh

Measurement

☐ Cocaine measurement I  
☐ Cocaine measurement II  
☐ MDMA measurement  
☐ MDMA/2-CB measurement  
☐ Heroin measurement  
☐ Ketamine measurement  
☒ Amphetamine measurement  
☐ Methamphetamine measurement

Run measurement

Results of Measurement

**Positive to:**

Amphetamine



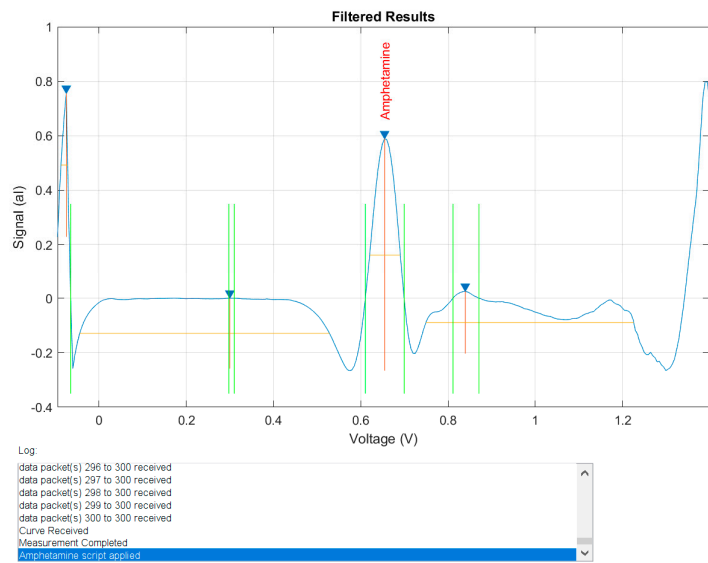

## Sample 34

Connect to device  
EmStat3Blue [1] Disconnect Refresh

Measurement

☐ Cocaine measurement I  
☐ Cocaine measurement II  
☐ MDMA measurement  
☐ MDMA/2-CB measurement  
☐ Heroin measurement  
☐ Ketamine measurement  
☒ Amphetamine measurement  
☐ Methamphetamine measurement

Run measurement

Results of Measurement

**Positive to:**

Amphetamine



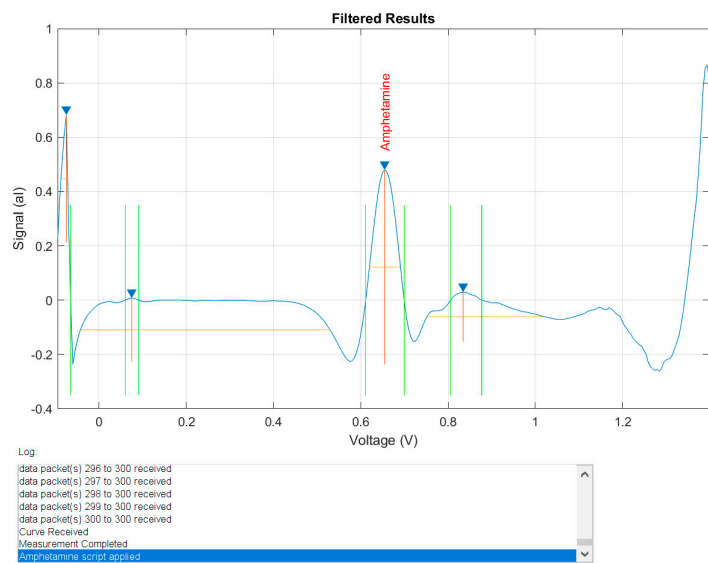

## Sample 35

Connect to device  
EmStat3Blue [1] Disconnect Refresh

Measurement

☐ Cocaine measurement I  
☐ Cocaine measurement II  
☐ MDMA measurement  
☐ MDMA/2-CB measurement  
☐ Heroin measurement  
☐ Ketamine measurement  
☒ Amphetamine measurement  
☐ Methamphetamine measurement

Run measurement

Results of Measurement

**Positive to:**  
Amphetamine


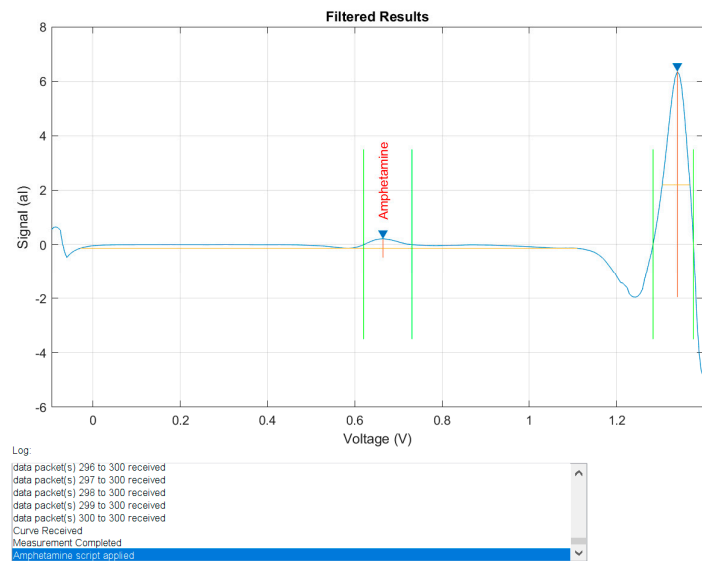

## Sample 36

Connect to device  
EmStat3Blue [1] Disconnect Refresh

Measurement

☐ Cocaine measurement I  
☐ Cocaine measurement II  
☐ MDMA measurement  
☐ MDMA/2-CB measurement  
☐ Heroin measurement  
☐ Ketamine measurement  
☒ Amphetamine measurement  
☐ Methamphetamine measurement

Run measurement

Results of Measurement

**Positive to:**  
Amphetamine


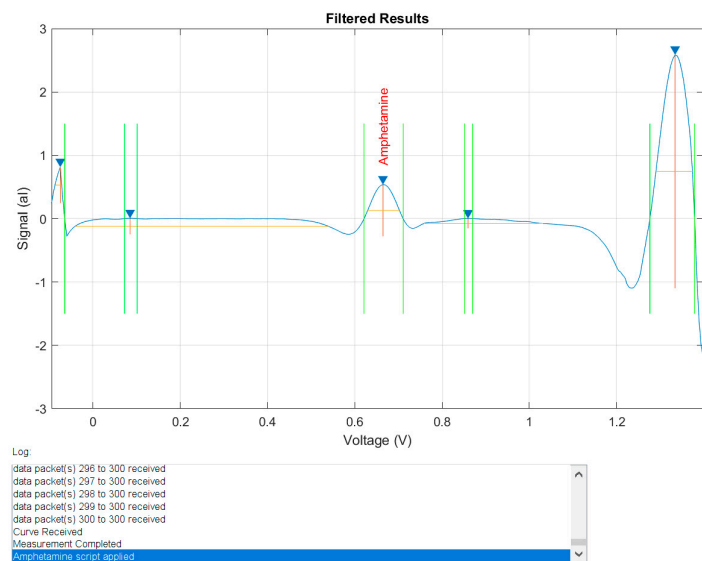

## Sample 37

Connect to device  
EmStat3Blue [1] Disconnect Refresh

Measurement

☐ Cocaine measurement I  
☐ Cocaine measurement II  
☐ MDMA measurement  
☐ MDMA/2-CB measurement  
☐ Heroin measurement  
☐ Ketamine measurement  
☒ Amphetamine measurement  
☐ Methamphetamine measurement

Run measurement

Results of Measurement

**Positive to:**  
Amphetamine



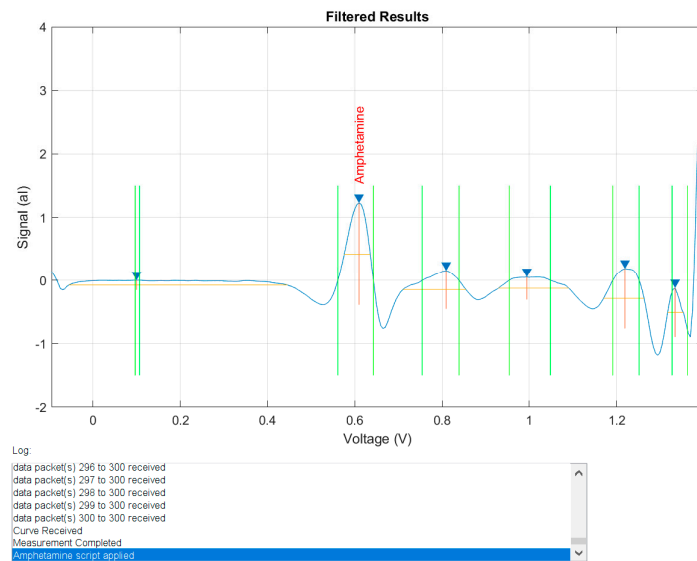

## Sample 38

Connect to device  
EmStat3Blue [1] Disconnect Refresh

Measurement

☐ Cocaine measurement I  
☐ Cocaine measurement II  
☐ MDMA measurement  
☐ MDMA/2-CB measurement  
☐ Heroin measurement  
☐ Ketamine measurement  
☒ Amphetamine measurement  
☐ Methamphetamine measurement

Run measurement

Results of Measurement

**Positive to:**  
Amphetamine



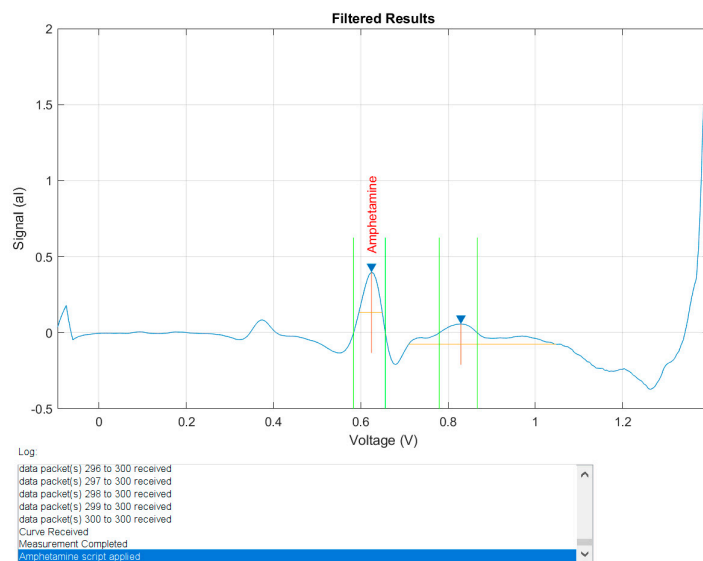



## Sample 39

Connect to device  
EmStat3Blue [1] Disconnect Refresh

Measurement

- ☐ Cocaine measurement I
- ☐ Cocaine measurement II
- ☐ MDMA measurement
- ☐ MDMA/2-CB measurement
- ☐ Heroin measurement
- ☐ Ketamine measurement
- ☒ Amphetamine measurement
- ☐ Methamphetamine measurement

Run measurement

Results of Measurement

**Positive to:**  
Amphetamine

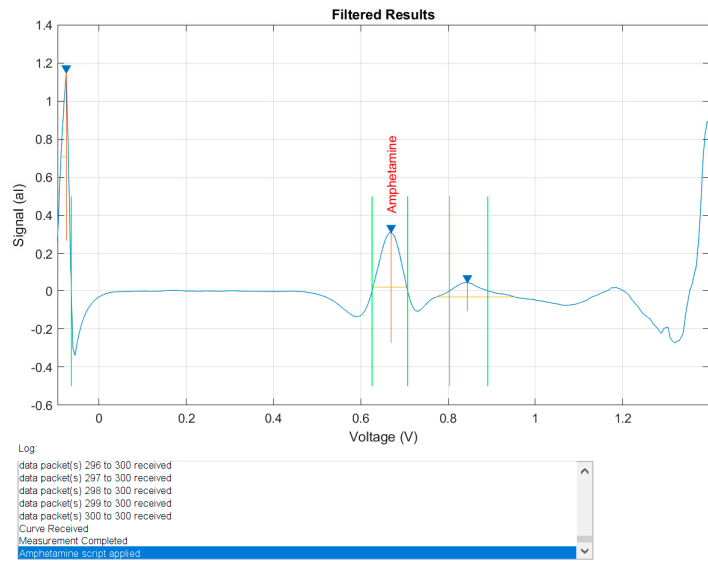

## Sample 40

Connect to device  
EmStat3Blue [1] Disconnect Refresh

Measurement

- ☐ Cocaine measurement I
- ☐ Cocaine measurement II
- ☐ MDMA measurement
- ☐ MDMA/2-CB measurement
- ☐ Heroin measurement
- ☐ Ketamine measurement
- ☒ Amphetamine measurement
- ☐ Methamphetamine measurement

Run measurement

Results of Measurement

**Positive to:**  
Amphetamine

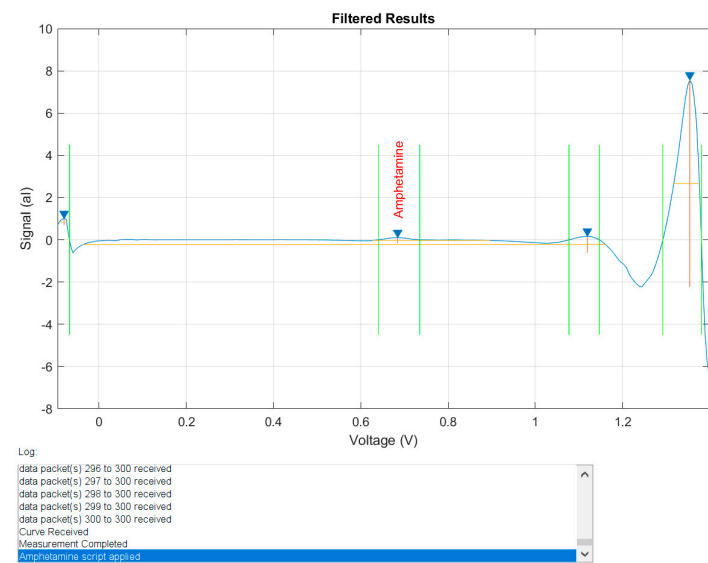

## Sample 41

Connect to device  
EmStat3Blue [1] Disconnect Refresh

Measurement

☐ Cocaine measurement I  
☐ Cocaine measurement II  
☐ MDMA measurement  
☐ MDMA/2-CB measurement  
☐ Heroin measurement  
☐ Ketamine measurement  
☐ Amphetamine measurement  
☒ Methamphetamine measurement

Run measurement

Results of Measurement

Positive to:



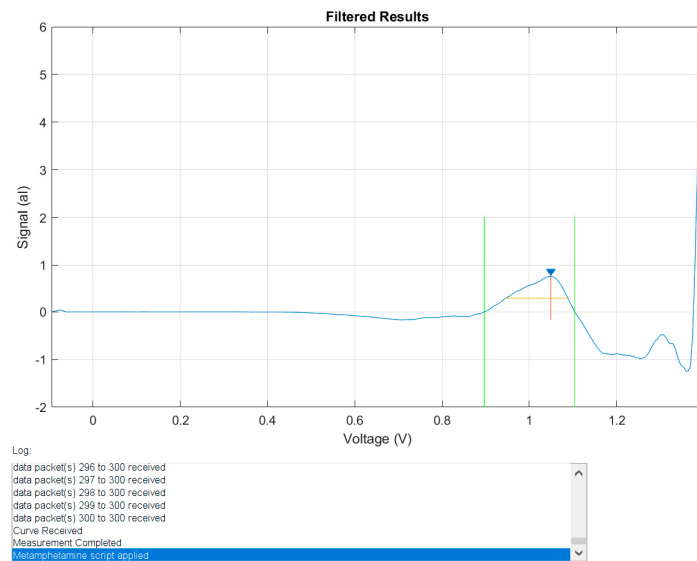

## Sample 42

Connect to device  
EmStat3Blue [1] Disconnect Refresh

Measurement

☐ Cocaine measurement I  
☐ Cocaine measurement II  
☐ MDMA measurement  
☐ MDMA/2-CB measurement  
☐ Heroin measurement  
☐ Ketamine measurement  
☐ Amphetamine measurement  
☒ Methamphetamine measurement

Run measurement

Results of Measurement

Positive to:



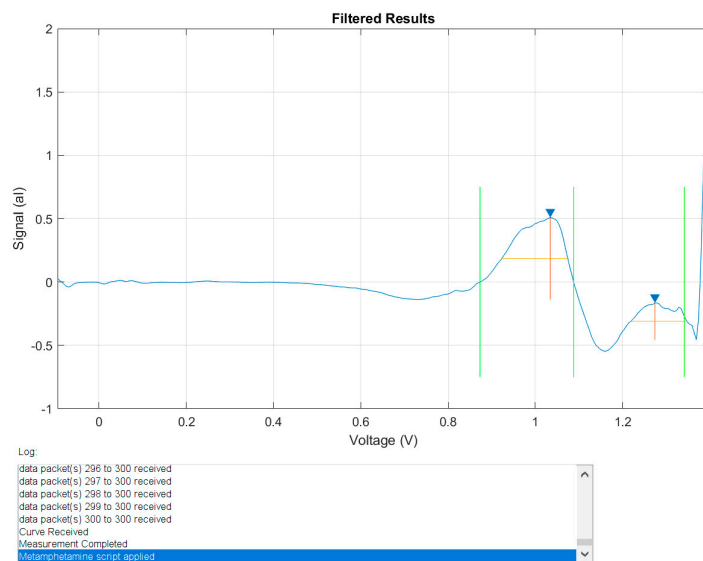

## Sample 43

Connect to device  
EmStat3Blue [1] Disconnect Refresh

Measurement

☐ Cocaine measurement I  
☐ Cocaine measurement II  
☐ MDMA measurement  
☐ MDMA/2-CB measurement  
☐ Heroin measurement  
☐ Ketamine measurement  
☐ Amphetamine measurement  
☒ Methamphetamine measurement

Run measurement

Results of Measurement

**Positive to:**  
Methamphetamine



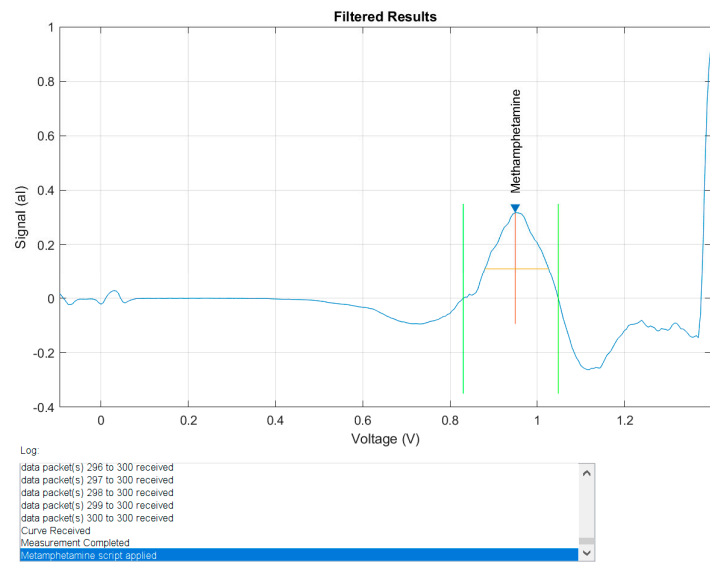

## Sample 44

Connect to device  
EmStat3Blue [1] Disconnect Refresh

Measurement

☐ Cocaine measurement I  
☐ Cocaine measurement II  
☐ MDMA measurement  
☐ MDMA/2-CB measurement  
☐ Heroin measurement  
☐ Ketamine measurement  
☐ Amphetamine measurement  
☒ Methamphetamine measurement

Run measurement

Results of Measurement

**Positive to:**  
Methamphetamine



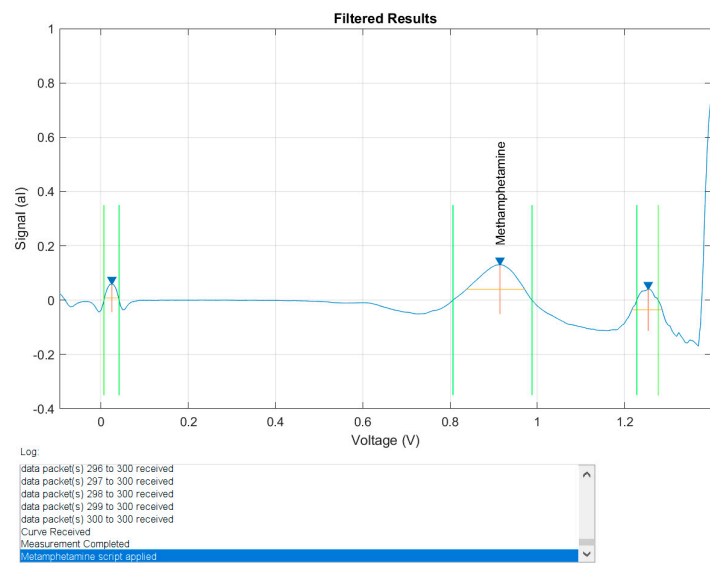



## Sample 45

Connect to device  
EmStat3Blue [1] Disconnect Refresh

Measurement

- ☐ Cocaine measurement I
- ☐ Cocaine measurement II
- ☐ MDMA measurement
- ☐ MDMA/2-CB measurement
- ☐ Heroin measurement
- ☐ Ketamine measurement
- ☐ Amphetamine measurement
- ☒ Methamphetamine measurement

Run measurement

Results of Measurement

**Positive to:**  
Methamphetamine

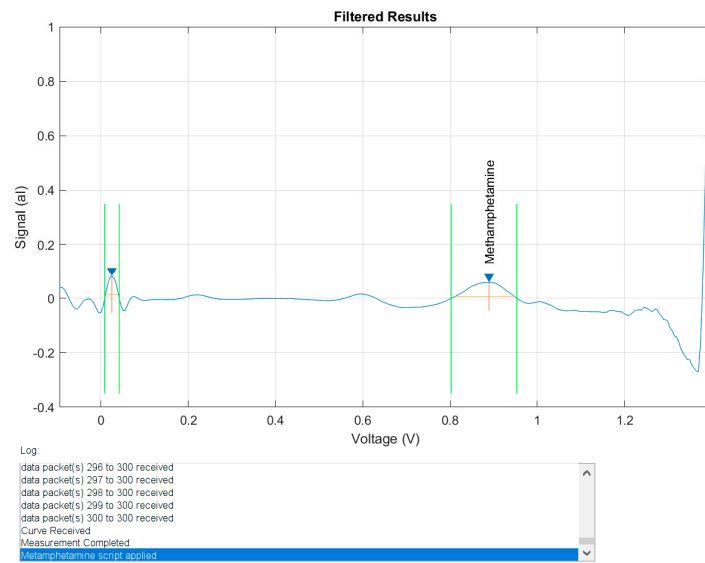

## Sample 46

Connect to device  
EmStat3Blue [1] Disconnect Refresh

Measurement

- ☐ Cocaine measurement I
- ☐ Cocaine measurement II
- ☐ MDMA measurement
- ☐ MDMA/2-CB measurement
- ☐ Heroin measurement
- ☐ Ketamine measurement
- ☐ Amphetamine measurement
- ☒ Methamphetamine measurement

Run measurement

Results of Measurement

**Positive to:**  
Methamphetamine

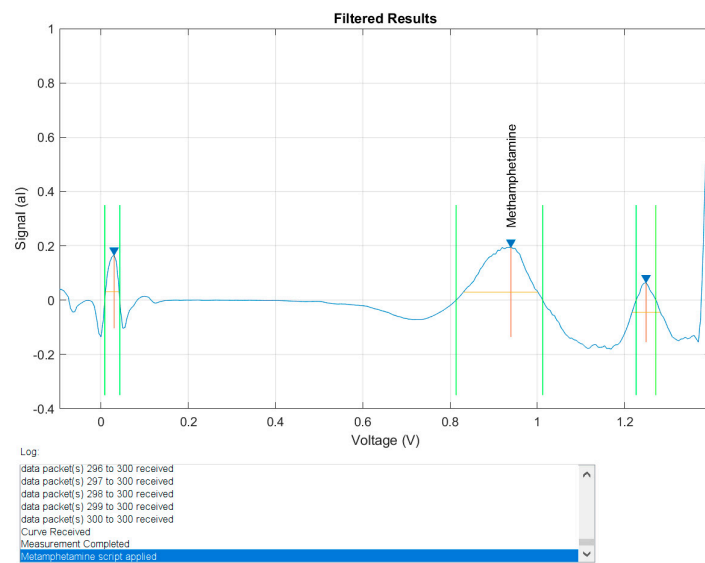



## Sample 47

Connect to device  
EmStat3Blue [1] Disconnect Refresh

Measurement

- ☐ Cocaine measurement I
- ☐ Cocaine measurement II
- ☐ MDMA measurement
- ☐ MDMA/2-CB measurement
- ☐ Heroin measurement
- ☐ Ketamine measurement
- ☐ Amphetamine measurement
- ☒ Methamphetamine measurement

Run measurement

Results of Measurement

**Positive to:**  
Methamphetamine

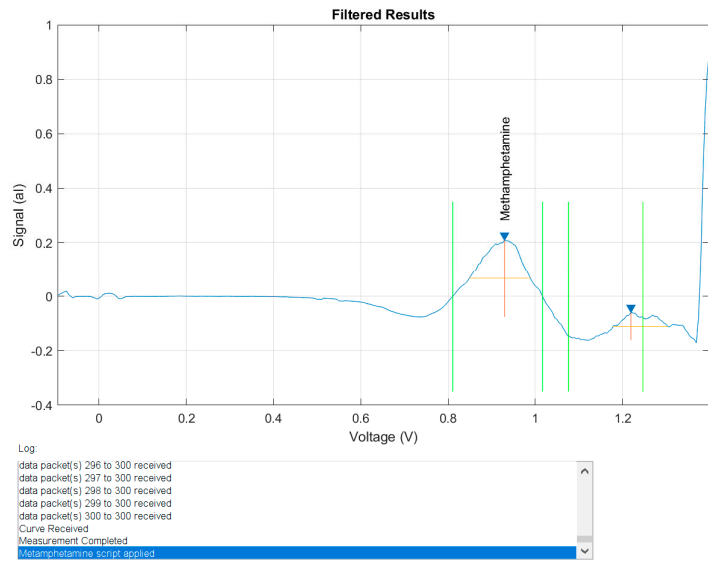

## Sample 48

Connect to device  
EmStat3Blue [1] Disconnect Refresh

Measurement

- ☐ Cocaine measurement I
- ☐ Cocaine measurement II
- ☐ MDMA measurement
- ☐ MDMA/2-CB measurement
- ☐ Heroin measurement
- ☐ Ketamine measurement
- ☐ Amphetamine measurement
- ☒ Methamphetamine measurement

Run measurement

Results of Measurement

**Positive to:**  
Methamphetamine

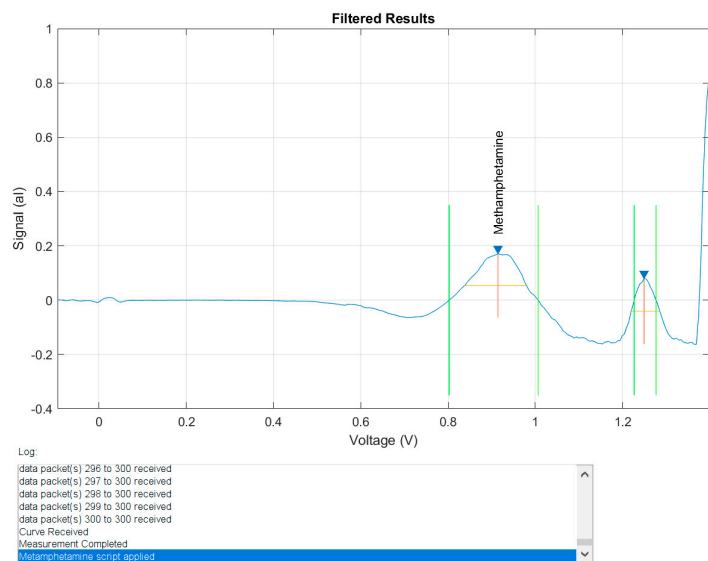

Supplement: s1 [file s1]
